# Supplementary material for: Urine Immunoglobin G Greater Than 2.45 mg/L Has a Correlation with the Onset and Progression of Diabetic Kidney Disease: A Retrospective Cohort Study
Source: MDPI journal article supplement (doi:10.3390/jpm13030452), 2023-02-28
Supplement: s1 [file s1]

**Table S1.** The relationship between urine IgG and the onset and progression of DKD. <sup>a</sup>Adjusted for age, ALT,AST,ALT/AST,BMI, DBP, DM duration, Follow-up time, GGT, HbA1c, HDL, LDL,SBP, SUA, SUREA, TC, TG, uβ2-MG, and uRBP. 24 h UAE, 24 hour urinary albumin excretion; ALT, alanine aminotransferase; AST, aspartate aminotransferase; BMI, body mass index; DBP, diastolic blood pressure; GGT, Glutamyl transpeptidase ;HbA1c, haemoglobin A1c; HDL, high-density lipoprotein; IgG, immunoglobulin G; LDL, low-density lipoprotein; SBP, systolic blood pressure; SUA, serum uric acid; SUREA, serum urea; TC, total cholesterol; TG, triglyceride uβ2-MG, urine β2-microglobulin ; uRBP, urine retinol-binding protein. Among patients with baseline 24 h UAE < 30 mg/24 h, those with eGFR ≥ 60 mL/min/1.73 m<sup>2</sup> and 24 h UAE <30 mg/24 h at the end of follow-up were categorised as ‘no onset’; those with eGFR < 60 mL/min/1.73 m<sup>2</sup> and 24 h UAE < 30 mg/24 h were categorised as ‘onset1’; those with eGFR ≥ 60 mL/min/1.73 m<sup>2</sup> and 24 h UAE ≥ 30 mg/24 h were categorised as ‘onset2’; and those with eGFR < 60 mL/min/1.73 m<sup>2</sup> and 24 h UAE ≥ 30 mg/24 h were categorised as ‘onset3’. Among patients with baseline 24 h UAE between 30 and 300 mg/24 h, those with eGFR ≥ 60 mL/min/1.73 m<sup>2</sup> and 24 h UAE <300 mg/24 h at the end of follow-up were categorised as ‘nonprogress’; those with eGFR < 60 mL/min/1.73 m<sup>2</sup> and 24 h UAE < 300 mg/24 h were categorised as ‘progress1’; those with eGFR ≥ 60 mL/min/1.73 m<sup>2</sup> and 24 h UAE ≥ 300 mg/24 h were categorised as ‘progress2’; and those with eGFR < 60 mL/min/1.73 m<sup>2</sup> and 24 h UAE ≥ 300 mg/24 h were categorised as ‘progress3’.

| Outcomes                                  | Baseline 24 h UAE < 30 mg/24 h (n = 733) |         |                            |                      |                            | Baseline 24 h UAE ≥ 30 mg/24 h (n = 302) |                            |                             |                      |          |
|-------------------------------------------|------------------------------------------|---------|----------------------------|----------------------|----------------------------|------------------------------------------|----------------------------|-----------------------------|----------------------|----------|
|                                           | Univariate analysis                      |         | Multivariate analysis      |                      | Outcomes                   | Univariate analysis                      |                            | Multivariate analysis       |                      | Outcomes |
|                                           | OR (95% CI)                              | p value | OR (95% CI)                | p value <sup>a</sup> |                            | OR (95% CI)                              | p value                    | OR (95% CI)                 | p value <sup>a</sup> |          |
| Onset- 1 BaselineU-<br>(n = 14) rine IgG  | 0.996<br>(0.916–<br>1.084)               | 0.929   | 1.013<br>(0.918–<br>1.118) | 0.794                | Progr-<br>ess1<br>(n = 15) | BaselineU-<br>rine IgG                   | 1.010<br>(0.998<br>–1.021) | 1.025<br>(1.002–<br>–1.049) | 0.104                | 0.031    |
| Onset- 2 BaselineU-<br>(n = 109) rine IgG | 1.048<br>(1.025–<br>1.072)               | < 0.001 | 1.039<br>(1.018–<br>1.061) | < 0.001              | Progr-<br>ess2<br>(n = 58) | BaselineU-<br>rine IgG                   | 1.029<br>(1.015<br>–1.044) | 1.031<br>(1.014<br>–1.048)  | < 0.001              | < 0.001  |
| Onset -3 BaselineU-<br>(n=15) rine IgG    | 1.055<br>(1.031–<br>1.079)               | < 0.001 | 1.051<br>(1.028–<br>1.074) | < 0.001              | Progr-<br>ess3<br>(n = 22) | BaselineU-<br>rine IgG                   | 1.032<br>(1.017<br>–1.048) | 1.022<br>(1.008<br>–1.037)  | < 0.001              | 0.002    |
